# Supplementary material
Source: MDPI journal article supplement (https://www.mdpi.com/2227-9040/9/6/121)
Supplement: s1 [file s1]

## Supplementary data

Colorimetric aptasensor for detecting *Bacillus carboniphilus* using aptamer isolated with a non-SELEX-based method

Hokyeong Kim<sup>a,b</sup>, Hye-Ri Kim<sup>a,c</sup>, Su-Jin Yoon<sup>d</sup>, Kang-Bong Lee<sup>d</sup>, Jungbae Kim<sup>b,\*</sup> and

ByoungChan Kim<sup>a,c,\*</sup>

<sup>a</sup> Center for Environment, Health and Welfare Research, Korea Institute of Science and Technology (KIST), Hwarangno 14-gil 5, Seongbuk-gu, Seoul 02792, Republic of Korea

<sup>b</sup> Department of Chemical and Biological Engineering, Korea University, Seoul 02841, Republic of Korea.

<sup>c</sup> Division of Energy and Environment Technology, KIST School, University of Science and Technology (UST), Hwarangno 14-gil 5, Seongbuk-gu, Seoul 02792, Republic of Korea

<sup>d</sup> National Agenda Research Division, Korea Institute of Science & Technology (KIST), Hwarang-ro 14-gil 5, Seongbuk-gu, Seoul 02792, Republic of Korea.

\* Corresponding authors

Jungbae Kim, Ph.D.

Tel: + 82 2 3290 4850

Fax: + 82 2 926 6102

E-mail address: jbkim3@korea.ac.kr (J. Kim)

Byoung Chan Kim, Ph.D.

Tel: + 82 2 958 5877

Fax: + 82 2 958 5805

E-mail address: [bchankim@kist.re.kr](mailto:bchankim@kist.re.kr) (B.C. Kim)

**Table S1.** Sequences of the *B. carboniphilus*-specific aptamers isolated using the centrifugation-based partitioning method.

| <b>Aptamer</b> | <b>Sequences of the random region</b>                              |
|----------------|--------------------------------------------------------------------|
| BCA-01         | TTG ATG TGA AGC TCG CAG CTT TCC GGG AGG CAT TGT TGA ACT TT         |
| BCA-02         | GCA TTC CGA GTG TTG GCT TAA GTT CCA TAC TCC TCG AAT GTG TAT        |
| BCA-03         | CCG CCT CTT GAT CGG CTG TTG CAT AGG TGC GTC AGC GGG CAT TCG        |
| BCA-04         | GCC ATC TCC CGG CTC AGG AGT AAC GCG CCC GCA TAC TTA GGG CAT        |
| <b>BCA-05</b>  | <b>CGG ACG GCT CTC GGG TTC TGC GGG TGT AAC CGA GAA ATA TCT ACG</b> |
| BCA-06         | ATG GGA AAT CCC AAA TTC TCA ACC GTT GAA TGC AGC CTT TCT GGG        |
| BCA-07         | GGC CGT TCC CCT GCA TTG AAG GTG CGG TCT AGC GTT CAT CCT GAA        |
| BCA-08         | TCT TTT GGC TCC GGG GCC GAT GTT CTC CCA GTG CCC TTG CGC CAG A      |
| BCA-09         | AAA AGC TAA CCG GGA CGC TAT TTG TAA GCA GAT ATC CTG ACA CCT        |
| BCA-10         | AGA CTG GCA CGG TTG CGG GTG ACC TGC TAA CAA GCC CCA TTA TCT        |
| BCA-11         | CGT TAG GTG TCA ACC CTC GTC GGG TCT CGC AGC CAA GTA GTG TAC G      |
| BCA-12         | GGG CTG GTG AAG CCA AAC TGC TCC ATT GGT CCA GCT TCG TCC AGC        |
| BCA-13         | GCC GGA GTC CAC TGC TGT TCA CGA TCT TGT AAG GCC TTT CGC GAT        |
| <b>BCA-14</b>  | <b>TGA TTT GGT TCC ACT GTT GCG GAG GGG TCT TAC TGC TAG TGG TTT</b> |
| BCA-15         | TGT GAT GGG GTG GGG GTT GTG AGG CCG GGT TGT TTG GTC TAC G          |
| BCA-16         | GTC TAC TTG GGG GTT TCC GCT TAT GTG TGT TAC GGG GGT TTT TGT        |
| BCA-17         | ACC GAG GGG GAG GCC ATC CGG GCA ATG TGT GGT GTT AGG GTC GGA        |
| BCA-18         | GGG TAC CTT CGT CAT GAC CAC AGG GTC TGC TAG TAC GGG TCT GTT        |
| BCA-19         | CGC CCA TTG GGG CTT GGT TAT TTT CAC CAA GTT GAG AAT TTT TGT        |
| BCA-20         | AGA AGG CTC GAA GTG CTC TAG AGA GTG GGC TAA TGT AAT TGC TCT        |
| BCA-21         | CAG CCA CGG TGT GGT TCA CCT TGG GTC CCT GGT TGG CGC CGC ATG        |
| BCA-22         | TCG GTT GTA AGT TCT TAC GTA TCC CGG GCG TTA CTC GTC TAT GGC        |
| <b>BCA-23</b>  | <b>TTG TCG CAT CAA TTT TTT TTT CAT CTG GTA GGC TCG CGA TTT C</b>   |
| BCA-24         | TAA TAT AGT ATG GCT TTC AGC CGT TTA CCT GTG AGA TTA GGT TTT        |
| BCA-25         | TCC CTA AAT CAG CAC CGA AAT GGT GAG GAT TAA TCG ACT AAG AT         |

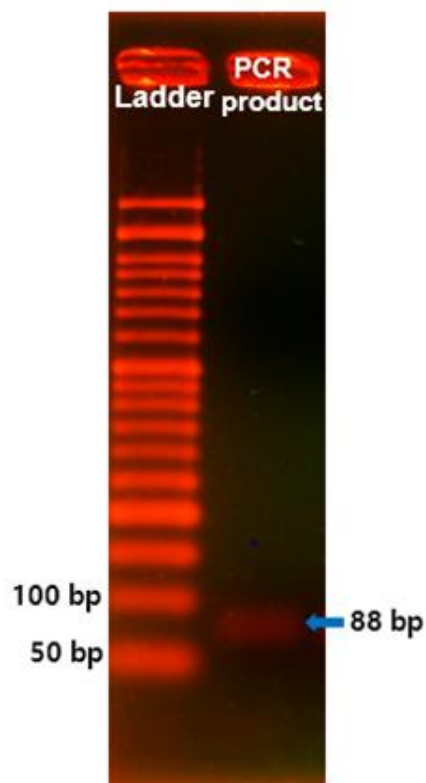

**Figure S1.** Agarose gel electrophoresis of the final PCR product. The band on lane 2 appeared between 50 and 100 base pairs(bp) is corresponding to the size, 88 bp of random DNA library used in aptamer selection

**BCA-05**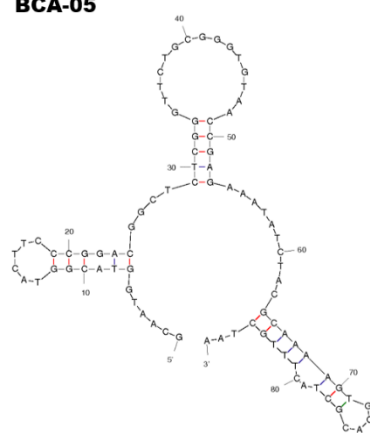**BCA-14**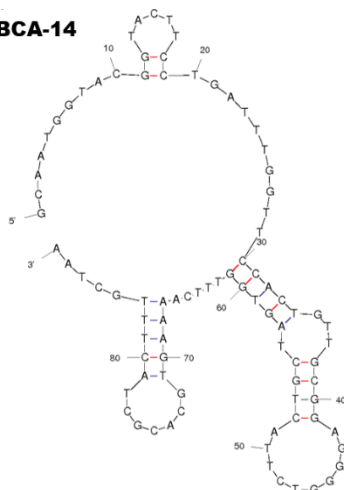**BCA-23**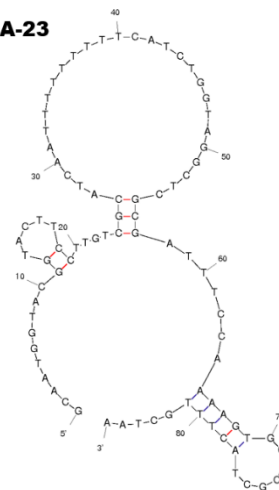

**Figure S2.** Secondary structures of isolated aptamers predicted by the Mfold algorithm.

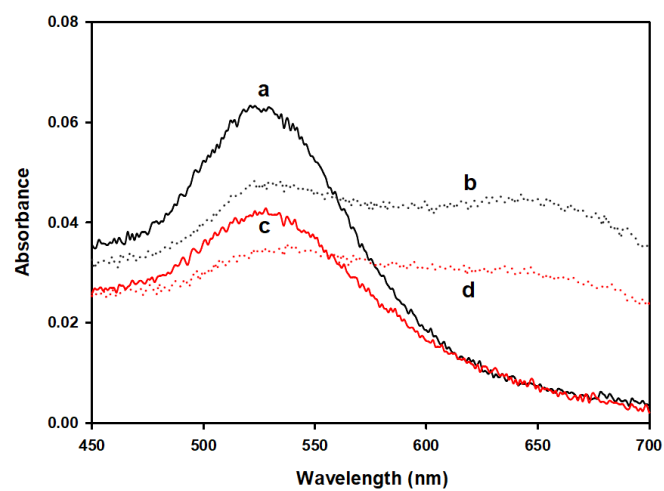

**Figure S3.** Ultraviolet-visible absorption spectra of AuNPs at each experimental condition: (a) AuNPs only (solid black line); (b) AuNPs without aptamer (black dot line); (c) AuNPs with the BCA-05 aptamer (solid red line); (d) AuNPs with the flow-through solution after BCA-05 binding to *B. carboniphilus* (red dot line). 0.6 M NaCl was added to b, c, and d.

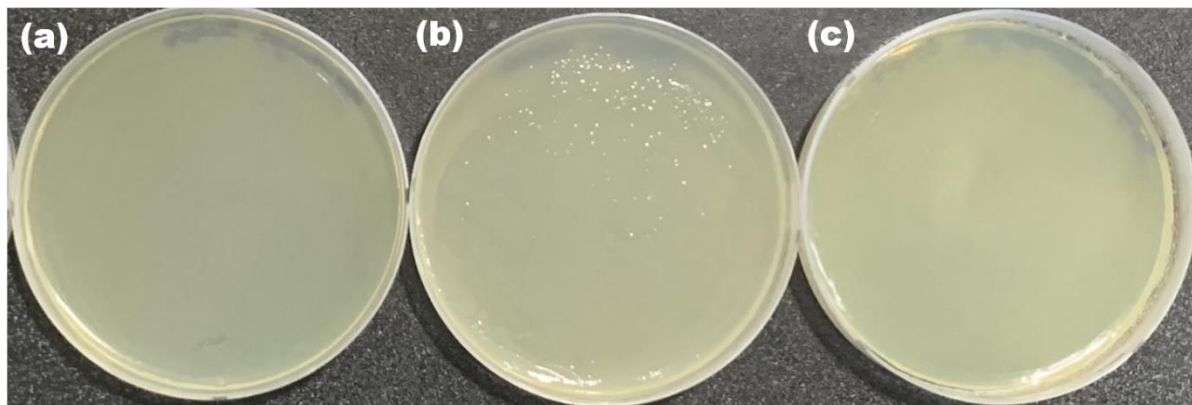

**Figure S4.** The formation of artificial biofilms on nutrient agar medium. (a) non-target bacterial mixture biofilm, (b) target bacterial biofilm, and (c) the target in bacterial mixture.
